# Supplementary figures and images for: An Absorption and Plasma Kinetics Study of Monoterpenes Present in Mastiha Oil in Humans
Source: MDPI journal article supplement (doi:10.3390/foods9081019), 2020-07-30

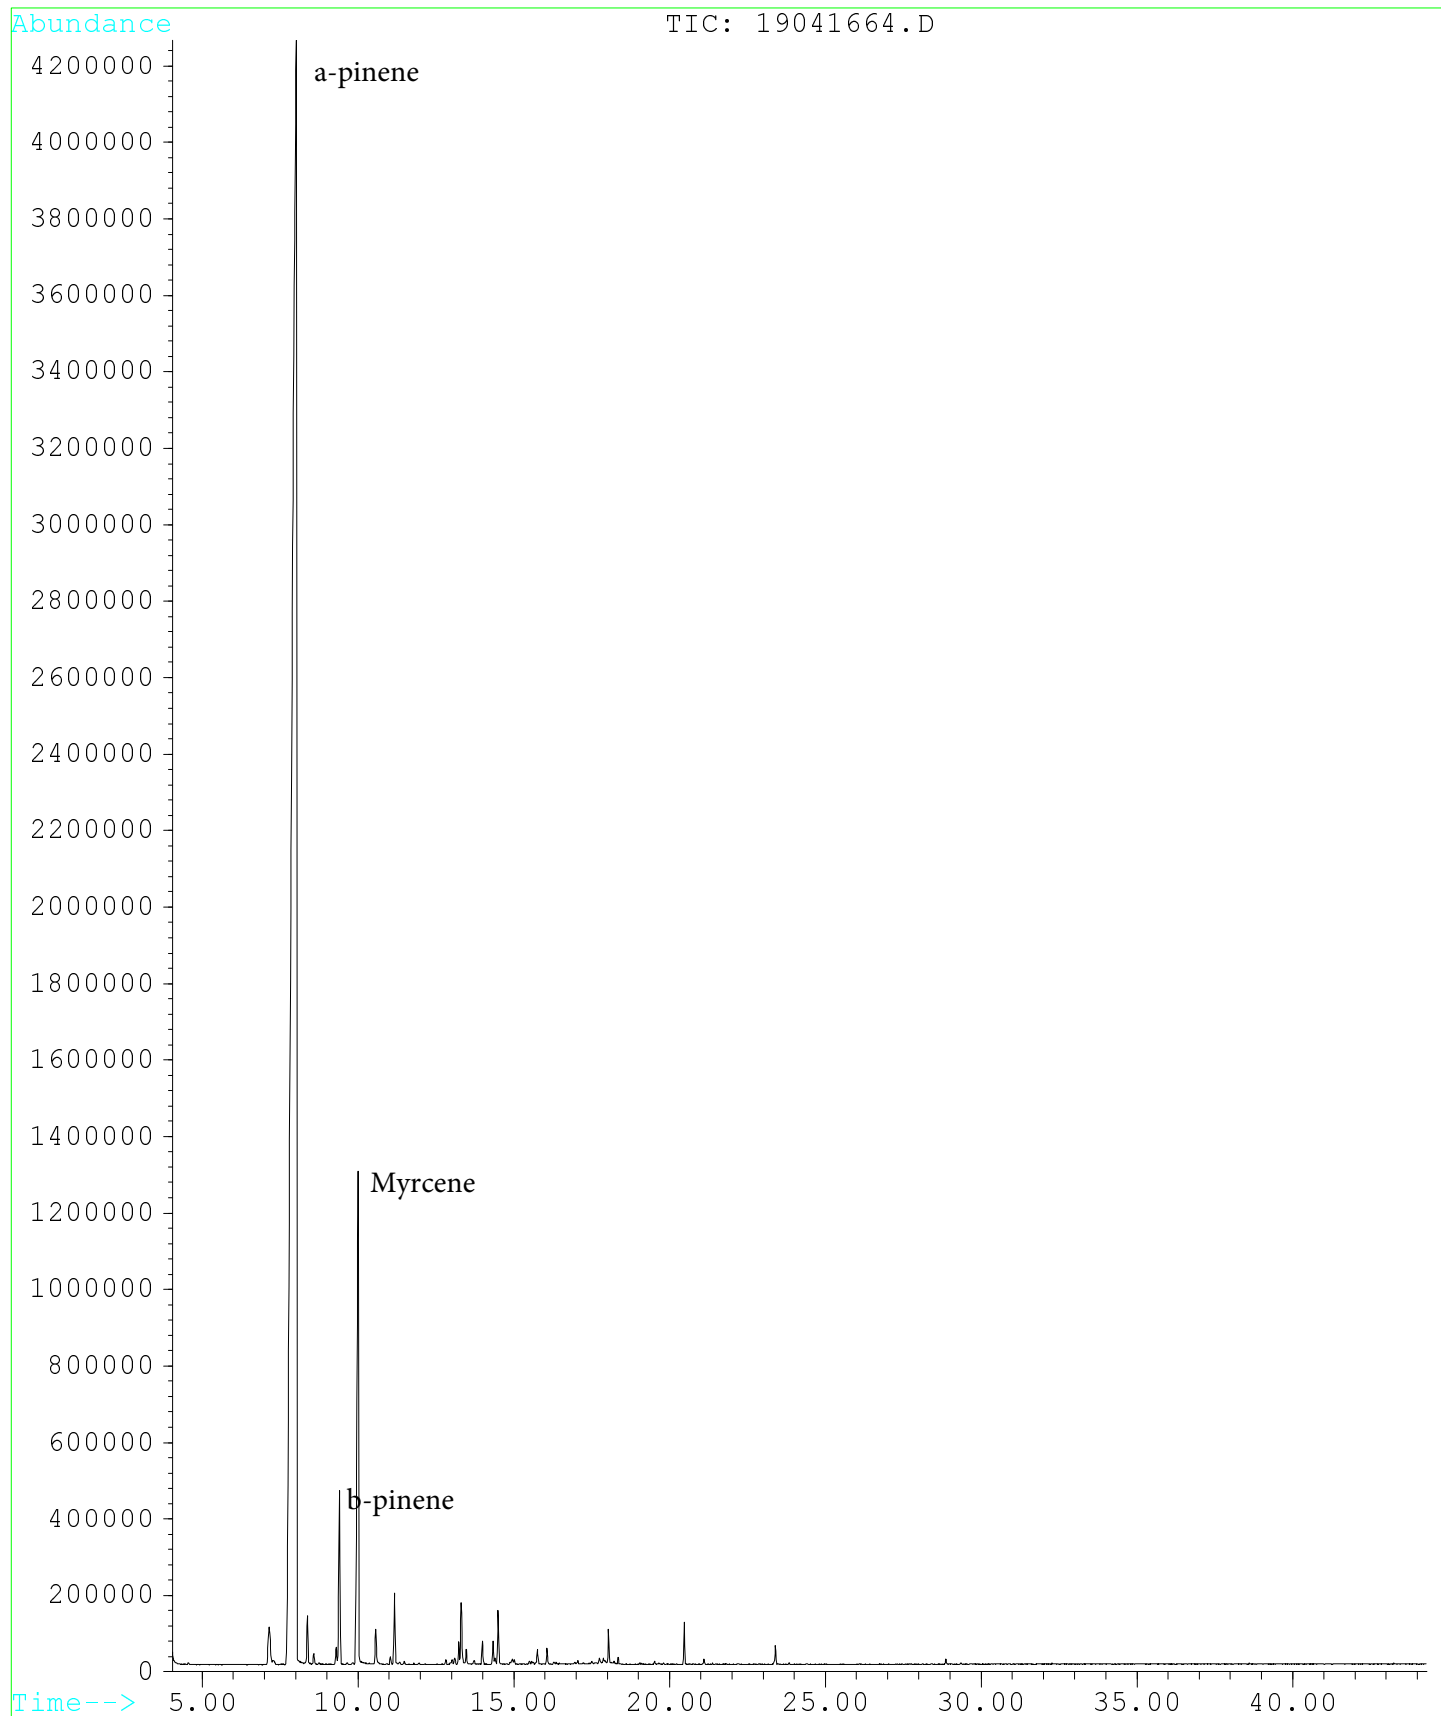

Supplement: s1 [file s1]

RT: 0.00 - 20.00

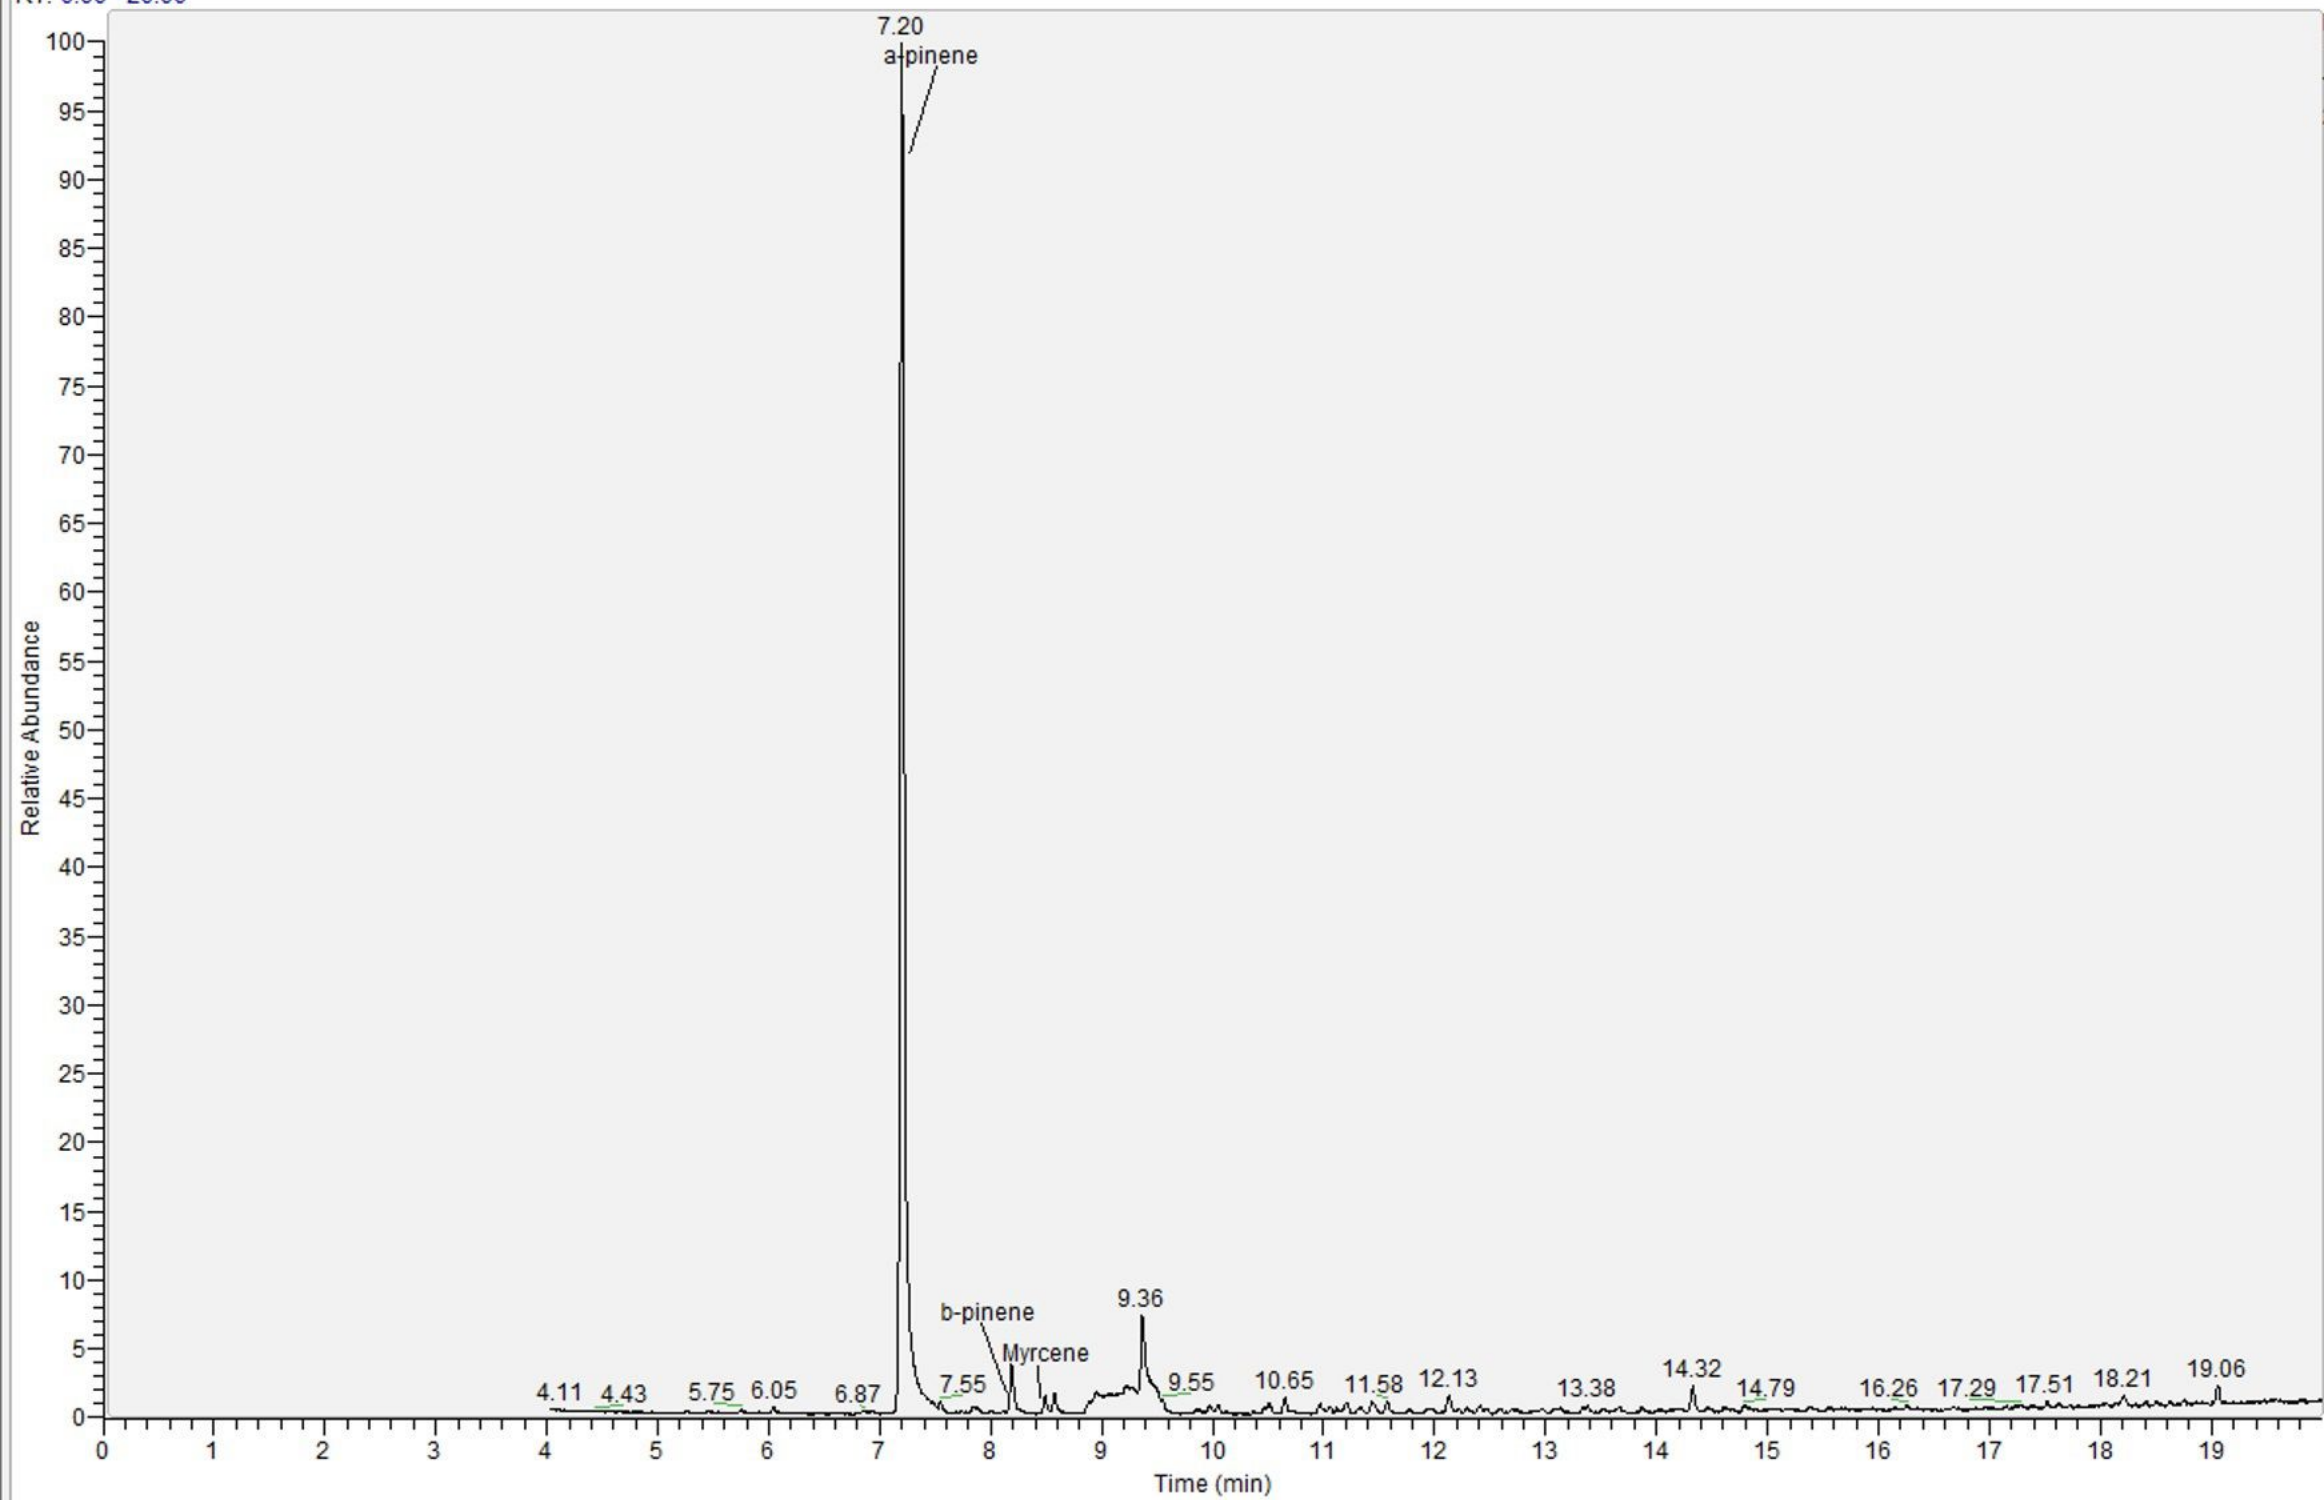

Supplement: s1 [file s1]
